# Supplementary material for: Comparative analysis of intestinal bacteria among venom secretion and non-secrection snakes
Source: Springer Nature journal article supplement (doi:10.1038/s41598-019-42787-6), 2019-04-19

## Supplementary materials

### Comparative analysis of intestinal bacteria among venom secretion and non-secretion snakes

Zuodong Qin<sup>1,2</sup>, Siqu Wang<sup>1</sup>, Dezhi Guo<sup>2</sup>, Jialiang Zhu<sup>1</sup>, Huahai Chen<sup>1</sup>, Le Bai<sup>2</sup>,  
Xiaofang Luo<sup>1</sup>, Yesi Yin<sup>1,\*</sup>

<sup>1</sup>Key Laboratory of Comprehensive Utilization of Advantage Plants Resources in Hunan South, College of Chemistry and Bioengineering, Hunan University of Science and Engineering, Yongzhou, Hunan, China

<sup>2</sup>Yongzhou City Strange Snake Science and Technology Industrial *Co., Ltd.* Yongzhou, Hunan, 425000, China

\* Correspondence: [yinyeshi@126.com](mailto:yinyeshi@126.com)

**Supplementary Table 1. Basic information regarding the snakes used in this study.**

| Breed                  | No. | Rearing pattern | Gender | Weight (Kg) | Length (metre) | Sample collection time |
|------------------------|-----|-----------------|--------|-------------|----------------|------------------------|
| <i>Deinagkistrodon</i> | D1  | Wild            | Female | 0.75        | ND             | 2-Nov-17               |
| <i>Deinagkistrodon</i> | D2  | Breed           | Female | 0.6         | ND             | 2-Nov-17               |
| <i>Deinagkistrodon</i> | D3  | Breed           | Female | 0.65        | ND             | 2-Nov-17               |
| <i>Deinagkistrodon</i> | D4  | Breed           | Male   | 0.25        | ND             | 2-Nov-17               |
| <i>Deinagkistrodon</i> | D5  | Breed           | Male   | 0.4         | ND             | 10-Nov-17              |
| <i>Deinagkistrodon</i> | D6  | Breed           | Male   | 0.4         | ND             | 10-Nov-17              |
| <i>Deinagkistrodon</i> | D7  | Breed           | Male   | 0.4         | ND             | 10-Nov-17              |
| <i>Deinagkistrodon</i> | D8  | Breed           | Female | 0.45        | ND             | 10-Nov-17              |
| <i>Naja</i>            | N1  | Wild            | Male   | 0.5         | 1.05           | 30-Sep-17              |
| <i>Naja</i>            | N2  | Breed           | Female | 0.5         | 0.95           | 30-Sep-17              |
| <i>Naja</i>            | N3  | Wild            | Male   | 0.5         | 1.1            | 30-Sep-17              |
| <i>Naja</i>            | N4  | Wild            | Male   | 0.5         | 1.05           | 30-Sep-17              |
| <i>Naja</i>            | N5  | Breed           | Male   | 0.6         | ND             | 2-Nov-17               |
| <i>Naja</i>            | N6  | Breed           | Male   | 0.6         | ND             | 2-Nov-17               |
| <i>Naja</i>            | N7  | Breed           | Female | 0.55        | ND             | 2-Nov-17               |
| <i>Naja</i>            | N8  | Breed           | Male   | 0.45        | ND             | 10-Nov-17              |
| <i>Naja</i>            | N9  | Breed           | Male   | 0.55        | ND             | 10-Nov-17              |
| <i>Naja</i>            | N10 | Breed           | Male   | 1.4         | ND             | 10-Nov-17              |
| <i>Naja</i>            | N11 | Breed           | Male   | 1.3         | ND             | 10-Nov-17              |
| <i>Naja</i>            | N12 | Breed           | Male   | ND          | ND             | 16-Nov-17              |
| <i>Naja</i>            | N13 | Breed           | Male   | ND          | ND             | 16-Nov-17              |
| <i>Naja</i>            | N14 | Breed           | Male   | ND          | ND             | 16-Nov-17              |
| <i>Ptyas mucosa</i>    | P1  | Breed           | Male   | 1.25        | 2.1            | 30-Sep-17              |
| <i>Ptyas mucosa</i>    | P2  | Breed           | Male   | 1.2         | ND             | 10-Nov-17              |
| <i>Ptyas mucosa</i>    | P3  | Breed           | Male   | 1.2         | ND             | 10-Nov-17              |
| <i>Ptyas mucosa</i>    | P4  | Breed           | Female | 0.9         | ND             | 10-Nov-17              |
| <i>Ptyas mucosa</i>    | P5  | Breed           | Male   | ND          | ND             | 16-Nov-17              |
| <i>Ptyas mucosa</i>    | P6  | Breed           | Male   | ND          | ND             | 16-Nov-17              |
| <i>Ptyas mucosa</i>    | P7  | Breed           | Female | ND          | ND             | 16-Nov-17              |

D, N, and P represents *Deinagkistrodon*, *Naja*, and *Ptyas mucosa*, respectively. ND represents not detected.

**Supplementary Table 2. Basic statistical results for high-throughput 16S rRNA gene sequencing.**

| Sample ID | Reads  | OTU (0.97) | Coverage | Ace    | Chao   | Shannon | Simpson |
|-----------|--------|------------|----------|--------|--------|---------|---------|
| D1_I      | 102324 | 359        | 99.95%   | 382.52 | 406.05 | 2.47    | 0.23    |
| D2_I      | 95640  | 345        | 99.97%   | 356.66 | 360.12 | 2.19    | 0.25    |
| D3_I      | 95438  | 352        | 99.92%   | 381.02 | 372.07 | 2.54    | 0.14    |
| D3_L      | 145406 | 198        | 99.96%   | 306.01 | 321.75 | 2.44    | 0.14    |
| D4_I      | 83510  | 256        | 99.92%   | 376.01 | 343.65 | 3.65    | 0.05    |
| D4_L      | 75579  | 270        | 99.97%   | 281.70 | 285.81 | 2.67    | 0.17    |
| D5_L      | 70757  | 211        | 99.94%   | 285.85 | 286.25 | 3.38    | 0.08    |
| D6_I      | 73958  | 104        | 99.95%   | 255.95 | 201.50 | 2.18    | 0.17    |
| D6_L      | 75368  | 294        | 99.90%   | 363.89 | 373.64 | 3.03    | 0.10    |
| D7_I      | 147420 | 495        | 99.93%   | 570.46 | 581.67 | 2.06    | 0.26    |
| D7_L      | 120619 | 366        | 99.95%   | 415.68 | 416.83 | 3.93    | 0.04    |
| D8_I      | 140727 | 243        | 99.95%   | 312.66 | 318.68 | 2.23    | 0.21    |
| D8_L      | 74611  | 386        | 99.83%   | 498.60 | 500.77 | 3.72    | 0.05    |
| N1_I      | 63319  | 150        | 99.91%   | 310.06 | 245.06 | 2.00    | 0.22    |
| N1_L      | 96753  | 274        | 99.92%   | 412.41 | 363.52 | 3.01    | 0.12    |
| N2_I      | 86450  | 517        | 99.83%   | 626.55 | 636.28 | 3.95    | 0.04    |
| N2_L      | 99001  | 289        | 99.93%   | 362.72 | 354.17 | 3.14    | 0.09    |
| N3_I      | 81141  | 329        | 99.88%   | 416.86 | 404.48 | 3.22    | 0.07    |
| N3_L      | 94750  | 241        | 99.96%   | 267.62 | 280.18 | 2.05    | 0.27    |
| N4_I      | 116403 | 372        | 99.97%   | 386.74 | 418.50 | 3.29    | 0.09    |
| N4_L      | 142531 | 215        | 99.97%   | 257.68 | 253.33 | 2.51    | 0.16    |
| N5_I      | 102463 | 298        | 99.91%   | 474.23 | 402.65 | 3.07    | 0.07    |
| N5_L      | 122811 | 289        | 99.94%   | 365.00 | 369.16 | 2.37    | 0.19    |
| N6_I      | 114964 | 435        | 99.93%   | 495.37 | 491.84 | 3.09    | 0.11    |
| N7_L      | 120256 | 180        | 99.95%   | 313.84 | 270.05 | 2.77    | 0.09    |
| N8_I      | 98403  | 181        | 99.93%   | 359.84 | 277.13 | 2.57    | 0.11    |
| N8_L      | 116670 | 300        | 99.95%   | 347.65 | 334.88 | 3.05    | 0.07    |
| N9_I      | 113063 | 458        | 99.92%   | 512.36 | 512.60 | 3.09    | 0.13    |
| N9_L      | 97692  | 513        | 99.95%   | 540.12 | 550.12 | 4.35    | 0.03    |
| N10_I     | 17370  | 375        | 99.59%   | 427.31 | 420.18 | 4.18    | 0.04    |
| N10_L     | 97971  | 213        | 99.95%   | 334.51 | 278.62 | 3.16    | 0.07    |
| N11_I     | 86405  | 330        | 99.89%   | 370.55 | 370.23 | 2.64    | 0.16    |
| N11_L     | 106417 | 431        | 99.91%   | 511.92 | 511.72 | 3.38    | 0.09    |
| N12_I     | 79430  | 513        | 99.82%   | 611.88 | 605.38 | 3.47    | 0.07    |
| N12_L     | 92712  | 280        | 99.93%   | 397.39 | 339.09 | 3.62    | 0.04    |
| N13_I     | 94335  | 170        | 99.95%   | 288.77 | 243.50 | 3.05    | 0.07    |
| N13_L     | 87453  | 456        | 99.88%   | 567.30 | 544.06 | 4.09    | 0.03    |
| N14_I     | 69778  | 238        | 99.86%   | 387.08 | 346.94 | 2.50    | 0.13    |

|       |        |     |        |        |        |      |      |
|-------|--------|-----|--------|--------|--------|------|------|
| N14_L | 62933  | 258 | 99.88% | 404.24 | 350.04 | 3.49 | 0.06 |
| P1_I  | 116923 | 265 | 99.97% | 287.72 | 298.48 | 2.52 | 0.18 |
| P1_L  | 100767 | 108 | 99.97% | 237.25 | 156.00 | 2.88 | 0.09 |
| P2_L  | 102193 | 131 | 99.96% | 228.85 | 177.87 | 2.57 | 0.14 |
| P3_I  | 86101  | 202 | 99.93% | 320.85 | 277.14 | 2.83 | 0.10 |
| P3_L  | 75856  | 91  | 99.97% | 113.40 | 133.00 | 2.59 | 0.13 |
| P5_I  | 101218 | 312 | 99.96% | 334.33 | 341.64 | 2.06 | 0.34 |
| P5_L  | 86702  | 200 | 99.93% | 278.29 | 254.03 | 2.97 | 0.07 |
| P6_I  | 65208  | 335 | 99.92% | 370.04 | 368.28 | 2.91 | 0.11 |
| P6_L  | 69632  | 228 | 99.93% | 277.83 | 269.44 | 2.51 | 0.16 |
| P7_I  | 64615  | 122 | 99.94% | 205.15 | 189.36 | 1.98 | 0.19 |
| P7_L  | 101834 | 289 | 99.91% | 387.01 | 391.69 | 2.60 | 0.11 |

D, N, and P represents *Deinagkistrodon*, *Naja*, and *Ptyas mucosa*, respectively. I and L represent ileum and large intestinal samples, respectively.

### Supplementary Figure 1. Basic analysis of sequenced data.

A, rarefaction curves of sequenced samples. B, the Shannon-Wiener curves of sequenced samples. C, Specaccum analysis of sequenced samples. D, Rank-abundance distribution curve of sequenced samples.

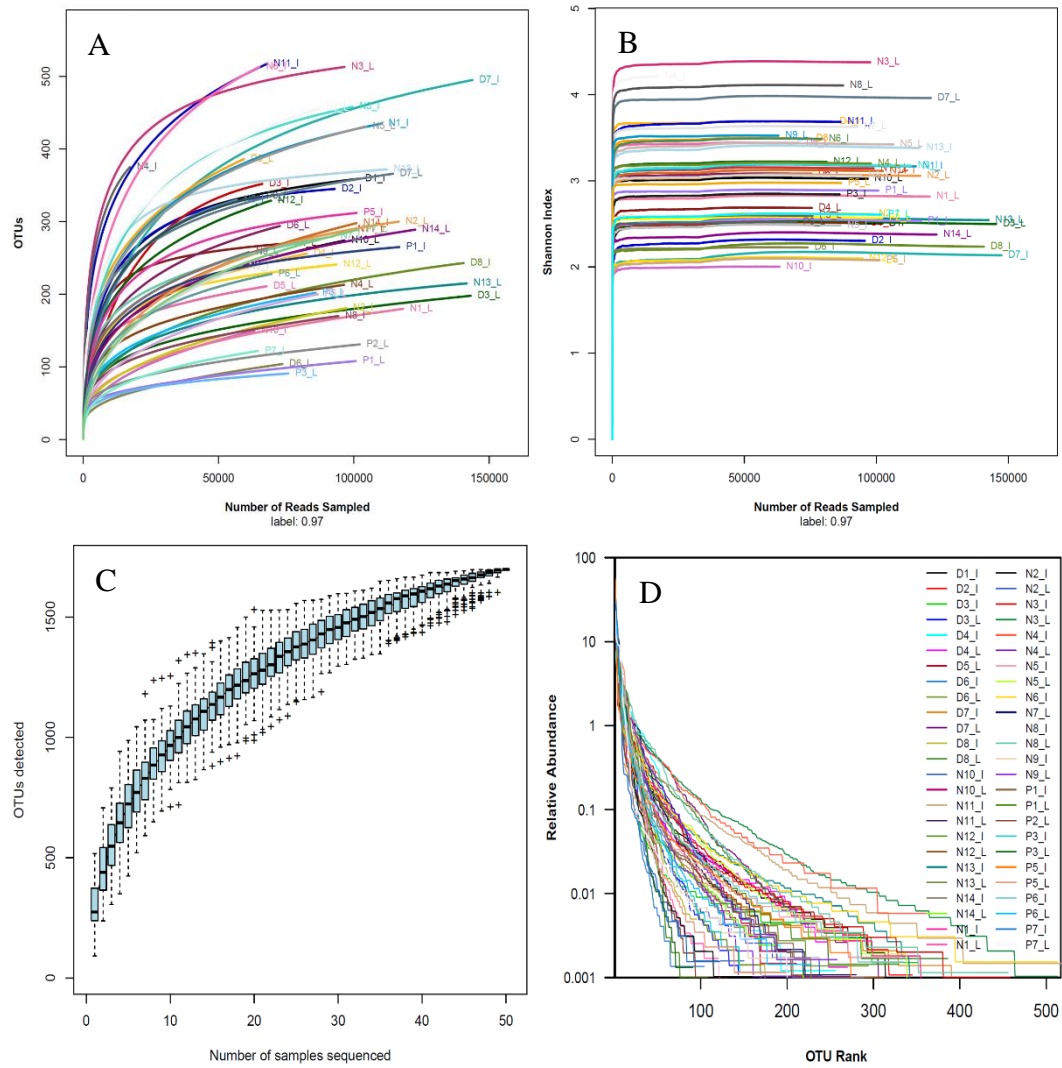

Supplementary Figure 2. Distribution of the core bacterial phyla.

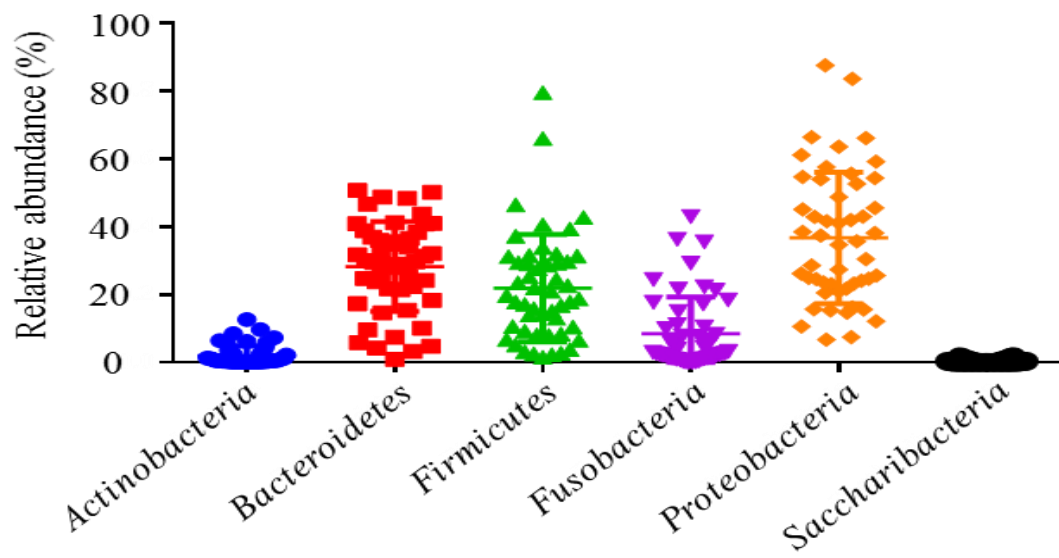

**Supplementary Figure 3. Significantly different bacterial phyla between snake breeds.**

A, different bacterial phyla between *Deinagkistrodon* to *Naja* samples; B, different bacterial phyla between *Deinagkistrodon* to *Ptyas mucosa* samples; C, different bacterial phyla between *Naja* to *Ptyas mucosa* samples.

**A**

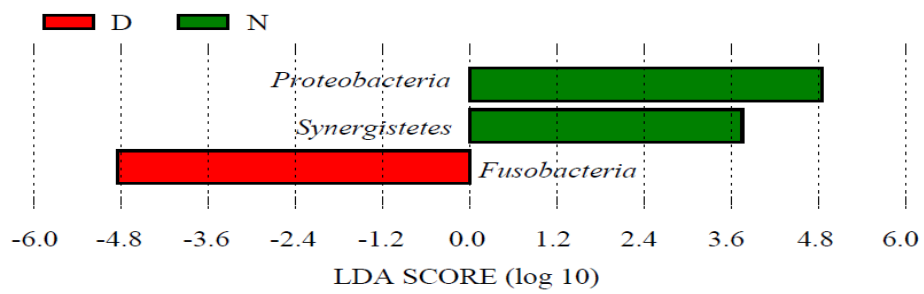

**B**

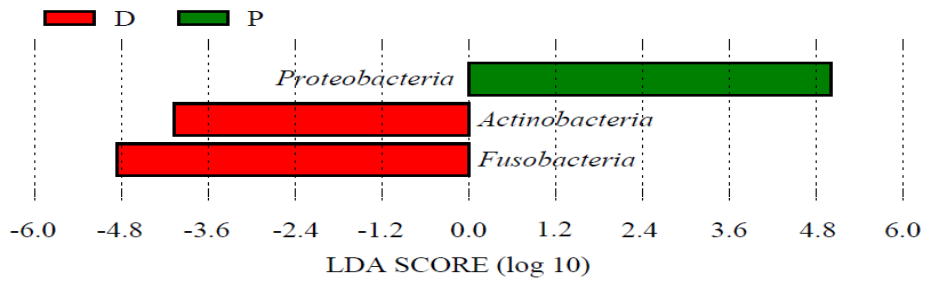

**C**

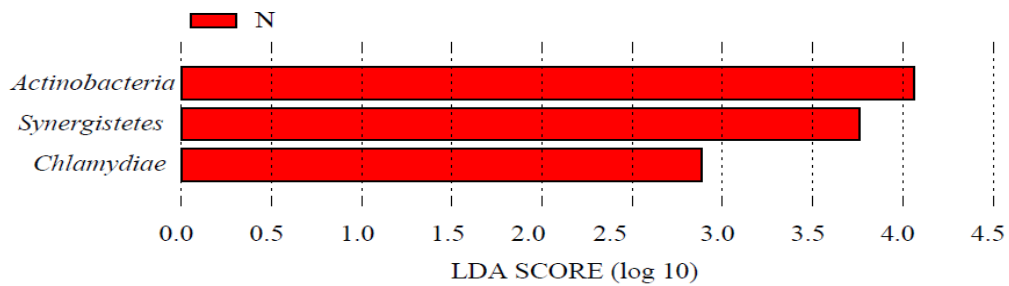

**Supplementary Figure 4. Distribution of the core bacterial genus.**

A, core bacterial genus in *Deinagkistrodon* samples; B, core bacterial genus in *Naja* samples; C, core bacterial genus in *Ptyas mucosa* samples.

**A**

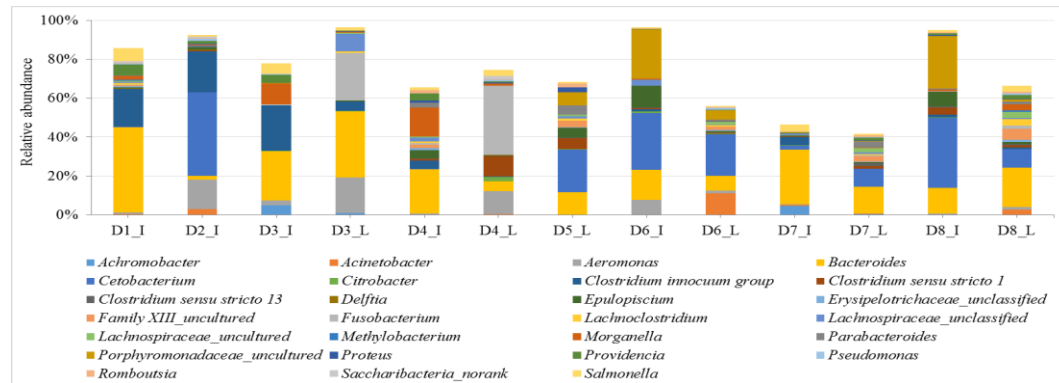

**B**

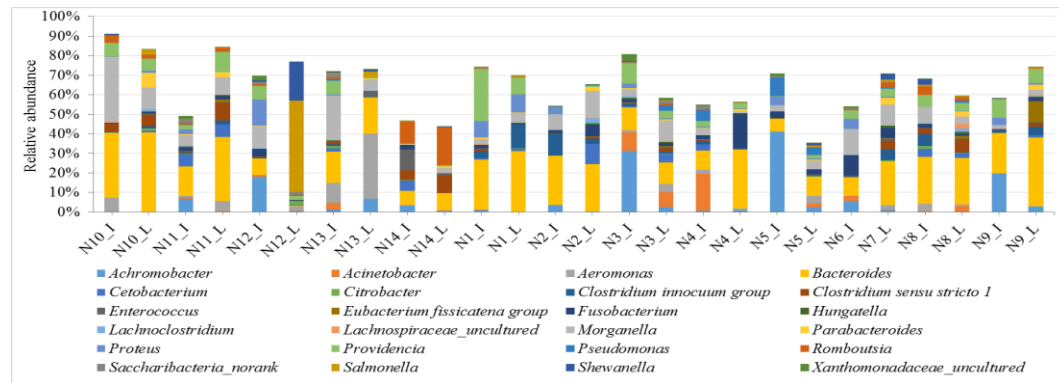

**C**

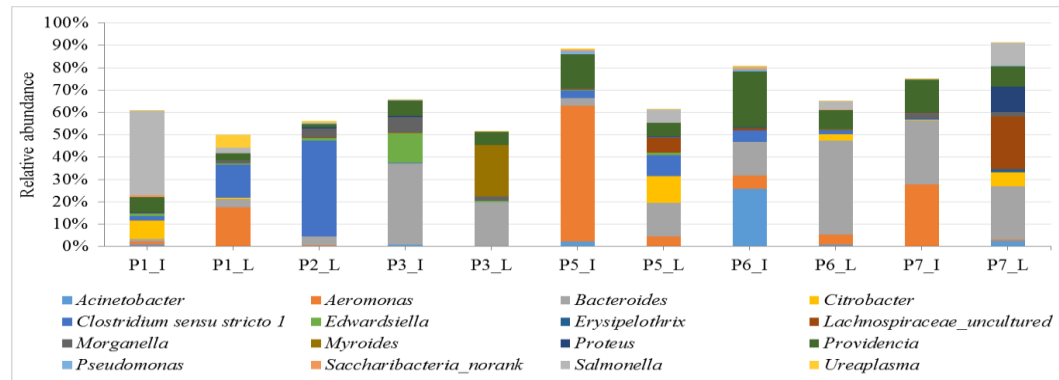



**Supplementary Figure 5. Significantly different bacterial genus between snake breeds.**

A, different bacterial genus between *Deinagkistrodon* to *Naja* samples; B, different bacterial genus between *Deinagkistrodon* to *Ptyas mucosa* samples; C, different bacterial genus between *Naja* to *Ptyas mucosa* samples.

A

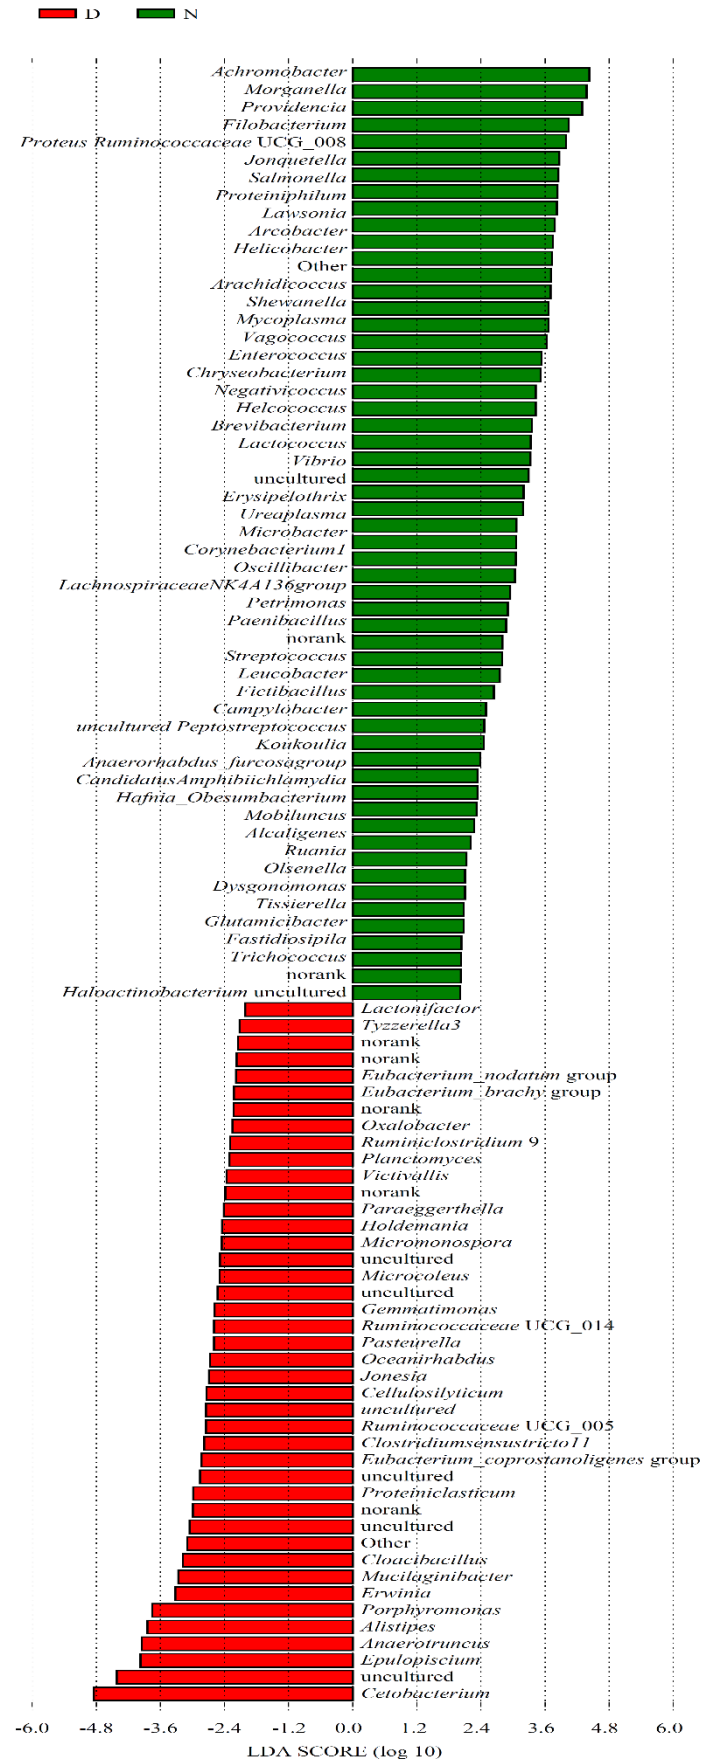

B

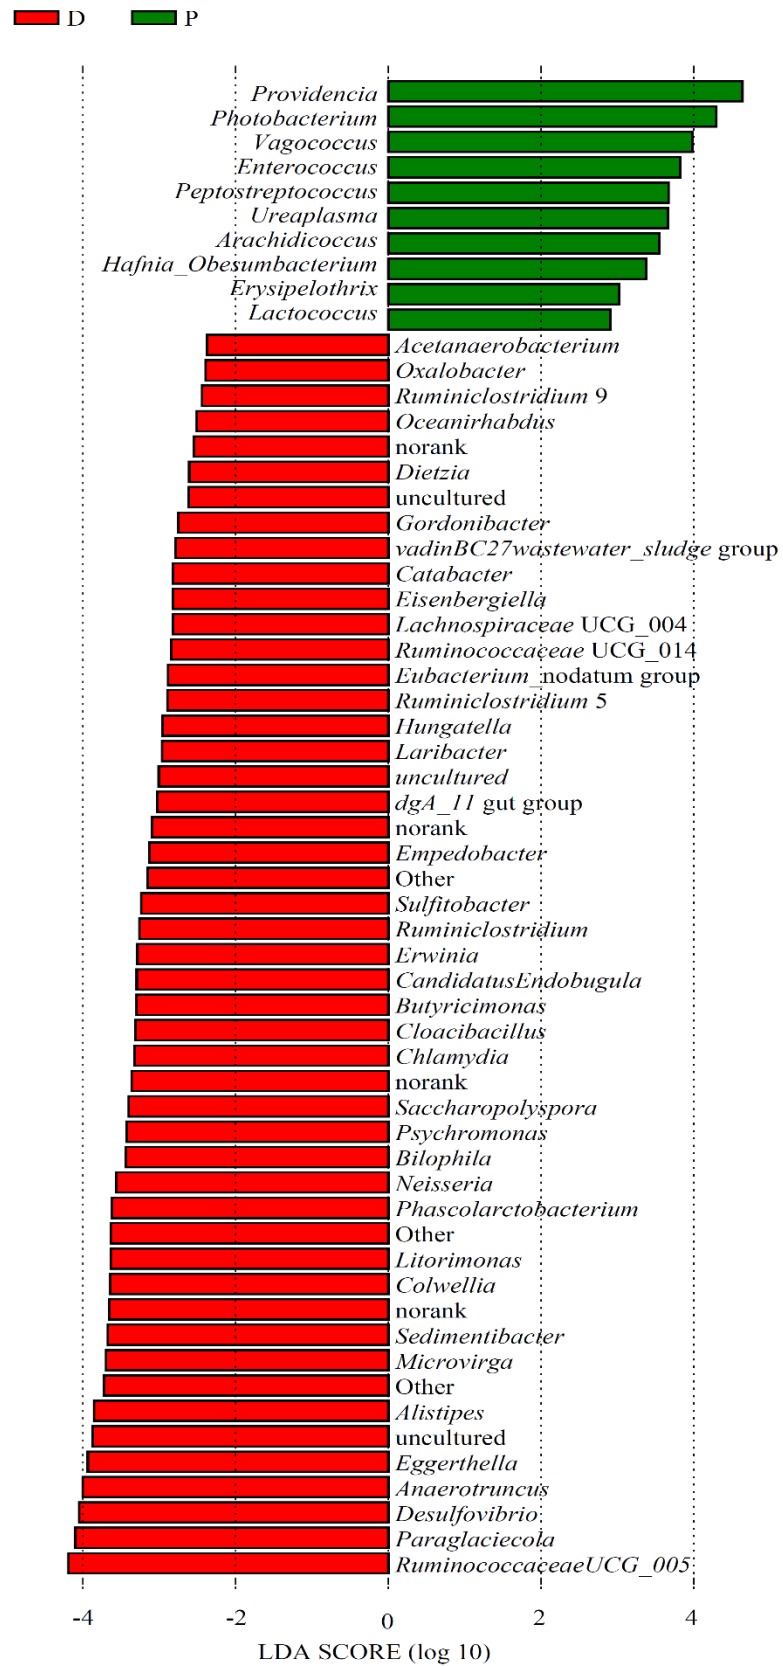

C

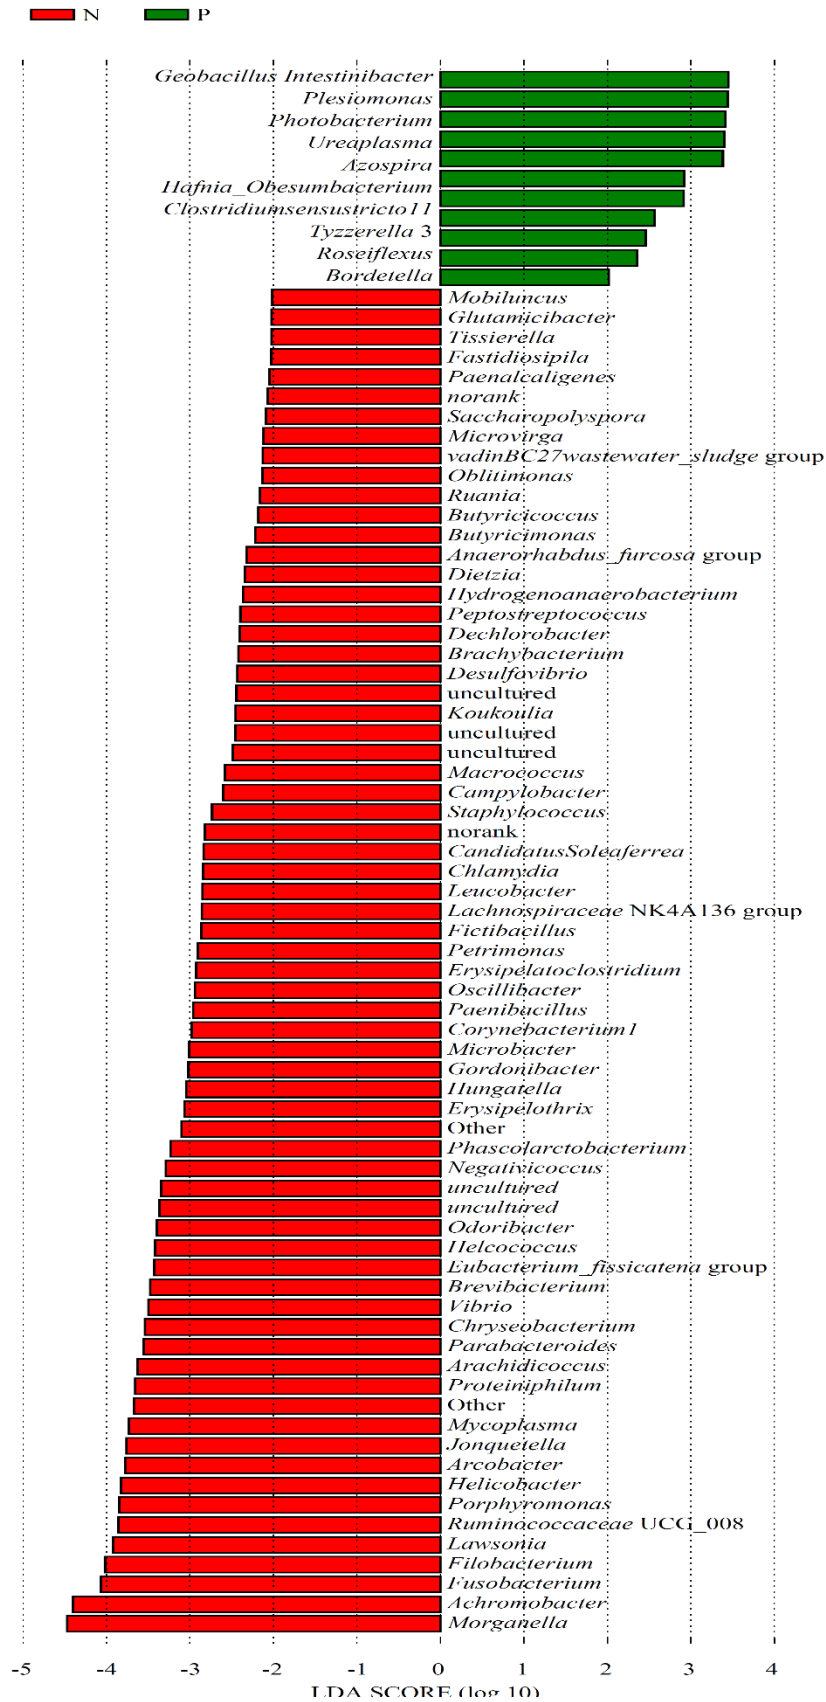

Supplement: 41598_2019_42787_MOESM1_ESM.pdf [file 41598_2019_42787_MOESM1_ESM.pdf]
